# Supplementary material for: Understanding data and information needs for palliative cancer care to inform digital health intervention development in Nigeria, Uganda and Zimbabwe: protocol for a multicountry qualitative study
Source: PubMed Central journal article supplement (PMC6830840; doi:10.1136/bmjopen-2019-032166), 2019-10-31
Supplement: bmjopen-2019-032166supp001.pdf [file bmjopen-2019-032166supp001.pdf]

**Appendix A: Palliative care reports undertaken in participating countries over the last 15 years**

| Country | Report                                                                                            | Key findings                                                                                                                                                                                                                                                                                                                                                                                                                                                                                                                                                                                                                                                                                                                                          |
|---------|---------------------------------------------------------------------------------------------------|-------------------------------------------------------------------------------------------------------------------------------------------------------------------------------------------------------------------------------------------------------------------------------------------------------------------------------------------------------------------------------------------------------------------------------------------------------------------------------------------------------------------------------------------------------------------------------------------------------------------------------------------------------------------------------------------------------------------------------------------------------|
| Nigeria | Federal Ministry of Health: Treat the Pain (2012 – 2015):                                         | <ul style="list-style-type: none"> <li>• Around 177,000 people were estimated to have died in moderate or severe pain from HIV or cancer.</li> <li>• The utilized narcotic medicines such as morphine was enough to treat only 266 people, representing 0.2% coverage of pain treatment</li> </ul>                                                                                                                                                                                                                                                                                                                                                                                                                                                    |
|         | Hospital Pain Free Initiative (2015 – date):                                                      | <ul style="list-style-type: none"> <li>• Program to improve access to essential pain medicines to reduce needless suffering from cancer</li> <li>• Pharmacist employed into Federal Ministry of Health specifically to coordinate the project</li> <li>• 19.2kg of pulverized morphine imported, enough to treat about 3,000 patients.</li> <li>• Strengthening the skills of health workers in pain assessment and management and equip them to provide high- quality pain treatment to their patients in line with World Health Organization (WHO) guidelines.</li> <li>• Four teaching hospitals selected for pilot project (Based on their palliative care activity and utilization of oral morphine solution). Expanded to 15 by 2018</li> </ul> |
|         | National Comprehensive Cancer Network Harmonized Guidelines for Sub-Saharan Africa (2018 - 2019): | <ul style="list-style-type: none"> <li>• Stakeholder workshops held leading to regional resources created as part of a collaborative efforts to combat rising cancer rates and unique care including palliative care</li> </ul>                                                                                                                                                                                                                                                                                                                                                                                                                                                                                                                       |
| Uganda  | Ministry of Health and National Drug clinical guidelines (2003):                                  | <ul style="list-style-type: none"> <li>• Nurses and Clinical officers are allowed to prescribe morphine for pain management</li> </ul>                                                                                                                                                                                                                                                                                                                                                                                                                                                                                                                                                                                                                |
|         | Uganda Health Strategic plan, 2006–2011:                                                          | <ul style="list-style-type: none"> <li>• Palliative Care is fully incorporated into the National Health Sector Strategic plan for the first time</li> </ul>                                                                                                                                                                                                                                                                                                                                                                                                                                                                                                                                                                                           |
|         | Evidence base for palliative care (2015)[48]                                                      | <ul style="list-style-type: none"> <li>• A lack of policies and guidelines to support the development of palliative care was noted</li> <li>• Plans to take forward palliative care development as part of the national health strategy</li> </ul>                                                                                                                                                                                                                                                                                                                                                                                                                                                                                                    |
|         | Implementing a palliative care nurse leadership                                                   | <ul style="list-style-type: none"> <li>• Trained palliative care nurses and clinical officers can effectively prescribe oral morphine</li> </ul>                                                                                                                                                                                                                                                                                                                                                                                                                                                                                                                                                                                                      |

|          |                                                                                                                                                                                                          |                                                                                                                                                                                                                                                                                                                                                                                                                                                                                                                                             |
|----------|----------------------------------------------------------------------------------------------------------------------------------------------------------------------------------------------------------|---------------------------------------------------------------------------------------------------------------------------------------------------------------------------------------------------------------------------------------------------------------------------------------------------------------------------------------------------------------------------------------------------------------------------------------------------------------------------------------------------------------------------------------------|
|          | fellowship program in Uganda (2016)[49]                                                                                                                                                                  |                                                                                                                                                                                                                                                                                                                                                                                                                                                                                                                                             |
|          | Atlas of palliative care development (2017):                                                                                                                                                             | <ul style="list-style-type: none"> <li>• Number of palliative care service outlets reported at 229</li> <li>• Number of pediatric palliative care services reported at 2</li> <li>• Has specialised training programmes for palliative care</li> <li>• Palliative care services per million inhabitants reported at 5.87</li> <li>• Has a Palliative Care National Association</li> <li>• Oral morphine is produced locally</li> </ul>                                                                                                      |
|          | National Cancer Control plan (2018):                                                                                                                                                                     | <ul style="list-style-type: none"> <li>• In the background based on an evidence brief for need for control strategy palliative care is recognised as part of the cancer control plan , and that it should be evidence based</li> <li>• The Development of the NCCPs is underway, with a draft in place and palliative care is inclusive</li> <li>• The NCCP addresses six key elements: (1) prevention, (2) early detection and screening, (3) diagnosis and treatment, (4) palliative care and (5) policy advocacy (6) research</li> </ul> |
|          | National eHealth strategy (2018):                                                                                                                                                                        | <ul style="list-style-type: none"> <li>• Baseline survey shows fragmented landscape of ICT pilot projects and numerous data and health information system (HIS) silos with significant barriers to the effective sharing of information between healthcare participants.</li> <li>• Uganda adopts eHealth strategy to guide the use of ICT in supporting health sector transformation by addressing</li> </ul>                                                                                                                              |
| Zimbabwe | WHO pilot study of palliative care in five African counties (2004):<br><a href="https://www.who.int/cancer/palliative/projectproposal/en/">https://www.who.int/cancer/palliative/projectproposal/en/</a> | <ul style="list-style-type: none"> <li>• Estimated 1/60 people in Zimbabwe in need of palliative care</li> <li>• Low level of palliative integration in the health system despite long history</li> <li>• Training is a major strength</li> <li>• Erratic pain relief</li> </ul>                                                                                                                                                                                                                                                            |
|          | African Palliative Care Association Policy and Gender Review in 10 countries (2010):                                                                                                                     | <ul style="list-style-type: none"> <li>• Minimal coverage of palliative care</li> <li>• No policies reviewed facilitated opioid availability</li> <li>• Revealed gaps to be addressed to scale up integration of palliative care</li> <li>• Recommended development of palliative care policy to guide actions and support for palliative care issues at national level</li> </ul>                                                                                                                                                          |

|                                                                                                        |                                                                                                                                                                                                                                                                                                                                                                                                                                                                                                                                                                                                                                                                                                                                                                                                |
|--------------------------------------------------------------------------------------------------------|------------------------------------------------------------------------------------------------------------------------------------------------------------------------------------------------------------------------------------------------------------------------------------------------------------------------------------------------------------------------------------------------------------------------------------------------------------------------------------------------------------------------------------------------------------------------------------------------------------------------------------------------------------------------------------------------------------------------------------------------------------------------------------------------|
| National Palliative Care Situational Analysis commissioned by HOSPAZ (2012):                           | <ul style="list-style-type: none"> <li>• Lack of knowledge and skills including listening and communication skills among care providers at all levels</li> <li>• Need exists for palliative care training, bereavement counselling and home-based care</li> <li>• Lack of knowledge / expertise in pain assessment and management using WHO analgesic ladder</li> <li>• Unavailability and erratic supply of pain control medicines, especially strong opioids</li> <li>• Children either not part of palliative care process or health providers have difficulty in handling their unique requirements (e.g. pain assessment and counselling)</li> <li>• Poor integration of palliative care into public sector</li> <li>• Lack of palliative care awareness and limited provision</li> </ul> |
| UNICEF and ICPCN Assessment of the Need for Palliative Care for Children: Three Country Report (2013): | <ul style="list-style-type: none"> <li>• Number of children benefiting from palliative care services significantly lower than the estimated need (6% of specialised need)</li> <li>• Lack of knowledge and adequate understanding of palliative care and children's palliative care among health professionals</li> <li>• Lack of palliative care awareness by general public hence limited demand</li> <li>• Poor pain management in children</li> <li>• Morphine prescribing limited to medical doctors which is problematic</li> </ul>                                                                                                                                                                                                                                                      |
| African Palliative Care Association Morphine Survey (2015):                                            | <ul style="list-style-type: none"> <li>• Some progress toward integration of palliative care into health systems</li> <li>• Advocacy for legal and policy changes recommended for nurse-prescribing of strong pain-relieving drugs, including opioids</li> <li>• Opioid use in 2012 only 10.1kg instead of expected 177kg deduced from disease burden</li> <li>• Recommended relevant knowledge on use of opioid analgesics to be integrated into medical and nursing school curricula</li> </ul>                                                                                                                                                                                                                                                                                              |
| Treat the Pain: A Country Snapshot (2016):                                                             | <ul style="list-style-type: none"> <li>• Estimated 80% of cancer deaths (2012/2013) experience moderate to severe pain</li> <li>• Average morphine consumption for 2011-2013 estimated 15.6kg, much lower than anticipated use</li> <li>• Coverage of deaths in pain with treatment: 6%</li> </ul>                                                                                                                                                                                                                                                                                                                                                                                                                                                                                             |
