# Supplementary material for: Understanding data and information needs for palliative cancer care to inform digital health intervention development in Nigeria, Uganda and Zimbabwe: protocol for a multicountry qualitative study
Source: PubMed Central journal article supplement (PMC6830840; doi:10.1136/bmjopen-2019-032166), 2019-10-31
Supplement: bmjopen-2019-032166supp002.pdf [file bmjopen-2019-032166supp002.pdf]

**Appendix B: Facilities involved in identification and recruitment of participants**

| <b>Country</b> | <b>Facility name</b>                           | <b>Type of facility</b>                                                  | <b>Participants to recruit from facility</b> |
|----------------|------------------------------------------------|--------------------------------------------------------------------------|----------------------------------------------|
| Nigeria        | Lagos University Teaching Hospital             | Tertiary care facility                                                   | Patients, caregivers, health professionals   |
|                | Sebecly Cancer Care and Support Center         | Private not-for-profit, community organisation                           | Patients, caregivers, health professionals   |
|                | National Ministry of Health, Nigeria           | National government office                                               | Policymakers                                 |
| Uganda         | Uganda Cancer institute (UCI )                 | Tertiary care medical facility                                           | Patients, caregivers, health professionals   |
|                | Makerere Palliative Care Unit, Mulago Hospital | National referral hospital                                               | Patients, caregivers, health professionals   |
|                | Kawempe Home Care                              | Private not-for-profit, community organisation                           | Patients, caregivers, health professionals   |
|                | Hospice Africa Uganda                          | Private not-for-profit, organisation with three facilities across Uganda | Patients, caregivers, health professionals   |
|                | Uganda Ministry of Health                      | National government office                                               | Policymakers                                 |
| Zimbabwe       | Chitungwiza Hospital                           | Central hospital                                                         | Patients, caregivers, health professionals   |
|                | Parirenyatwa Group of Hospitals                | Central hospital                                                         | Patients, caregivers, health professionals   |
|                | National Ministry of Health staff              | National government office                                               | Policymakers                                 |
|                | Island Hospice and Healthcare                  | Private not-for-profit, community organisation                           | Patients, caregivers, health professionals   |
